# Supplementary material for: Case Report: Octreotide plus CVD chemotherapy for the treatment of multiple metastatic paragangliomas after double resection for functional bladder paraganglioma and urothelial papilloma
Source: PubMed Central journal article supplement (PMC9895770; doi:10.3389/fonc.2022.1072361), 2023-01-20
Supplement: Image_2.pdf [file Image_2.pdf]

**A**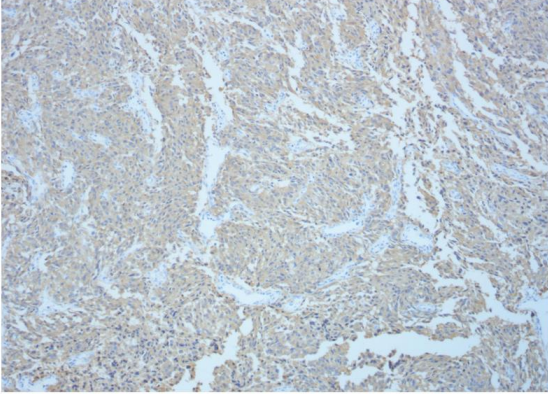**B**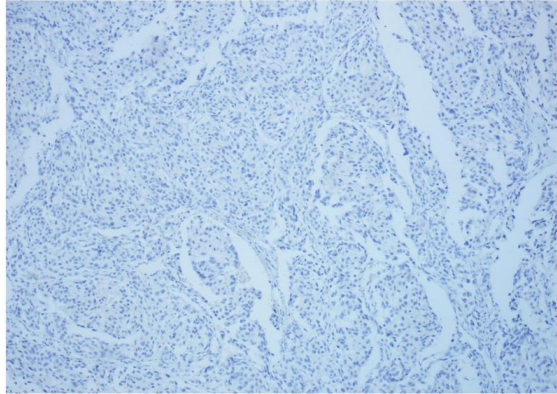**C**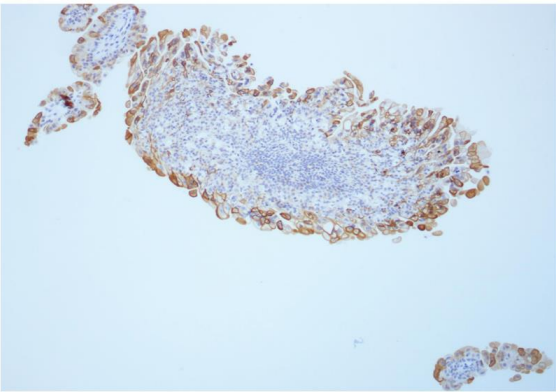**D**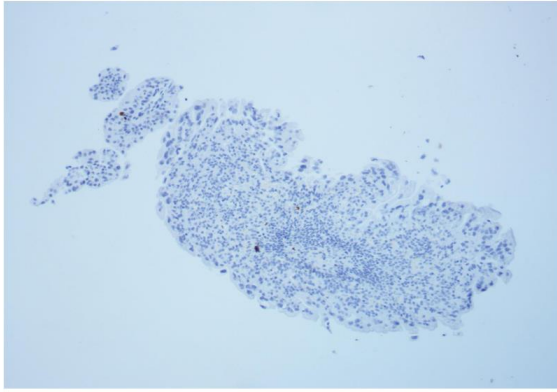

**SUPPLEMENTARY FIGURE 2 The intraoperative condition and postoperative pathology results.** (A, B) The results of postoperative pathology with Syn(+) (A) and S-100 (-) (B) in IHC staining of bladder pheochromocytomas. (C, D) The results of postoperative pathology with HE staining and CK20+(umbrella cells) (C) and Ki-67+(1%) (D) in IHC staining of urothelial papilloma.
